# Supplementary material
Source: PubMed Central journal article supplement (PMC3334298)
Supplement: NIHMS363277-supplement-1_si_001.pdf [file NIHMS363277-supplement-1_si_001.pdf]

## Supporting Information

**Table S1.** Summary of homologues for each *pqq* gene product.

| Products of<br><i>pqq</i> genes | Average length<br>of seeds <sup>1</sup><br>(amino acids) | Pfam domain                                                                | Number of<br>global<br>homologues | Minimum<br>identity in<br>homologues<br>(%) |
|---------------------------------|----------------------------------------------------------|----------------------------------------------------------------------------|-----------------------------------|---------------------------------------------|
| PqqA                            | 27                                                       | PqqA                                                                       | 124                               | 22.7                                        |
| PqqB                            | 302                                                      | No domain from Pfam, but a<br>PQQ_syn_pqqB domain from<br>CDD <sup>2</sup> | 797                               | 16.6                                        |
| PqqC                            | 246                                                      | TENA_THI-4                                                                 | 518                               | 9.2                                         |
| PqqD                            | 93                                                       | PqqD                                                                       | 518                               | 7.4                                         |
| PqqE                            | 372                                                      | Radical_SAM                                                                | 662                               | 18                                          |
| PqqF                            | 576                                                      | peptidase_M16, peptidase_M16_C                                             | 572                               | 13.4                                        |

<sup>1</sup> See **Table 1** for the description of seeds.

<sup>2</sup> CDD: conserved domain database of NCBI.

**Table S2.** Species that contain PqqB-E.<sup>a</sup>

| Species                                                                                 | Pathogenicity                                           | Set of Pqq synthesis genes |
|-----------------------------------------------------------------------------------------|---------------------------------------------------------|----------------------------|
| * <i>Acetobacter pasteurianus</i> IFO 3283-01-42C                                       |                                                         | ABCDE                      |
| * <i>Acidiphilium cryptum</i> (strain JF-5)                                             |                                                         | ABCDE                      |
| * <i>Acidobacterium</i> sp. MP5ACTX8                                                    |                                                         | ABCDE                      |
| * <i>Acinetobacter baumannii</i> ATCC 19606                                             | Opportunistic human pathogen                            | ABCDE                      |
| * <i>Acinetobacter calcoaceticus</i>                                                    |                                                         | ABCDE                      |
| <i>Acinetobacter haemolyticus</i> ATCC 19194                                            | Rare human pathogen                                     | BCDE                       |
| <i>Acinetobacter</i> sp. RUH2624                                                        |                                                         | ABCDE                      |
| * <i>Agrobacterium radiobacter</i> (strain K84/ATCC BAA-868)                            |                                                         | ABCDE                      |
| * <i>Arcobacter nitrofigilis</i> (strain ATCC 33309/DSM 7299/LMG 7604/NCTC 12251/CI)    |                                                         | ABCDEF                     |
| * <i>Azospirillum</i> sp. (strain B510)                                                 |                                                         | ABCDEF                     |
| * <i>Azotobacter vinelandii</i> (strain DJ/ATCC BAA-1303)                               |                                                         | ABCDEF                     |
| * <i>Azoarcus</i> sp. (strain BH72)                                                     | Plant symbiont                                          | ABCDEF                     |
| * <i>Beijerinckia indica</i> subsp. <i>indica</i> (strain ATCC 9039/DSM 1715/NCIB 8712) |                                                         | ABCDEF                     |
| <sup>†</sup> <i>beta proteobacterium</i> KB13                                           |                                                         | BCDEF                      |
| * <i>Bradyrhizobium japonicum</i>                                                       | Plant symbiont                                          | ABCDEF                     |
| * <i>Bradyrhizobium</i> sp. (strain BTAi1/ATCC BAA-1182)                                | Plant symbiont                                          | ABCDEF                     |
| * <i>Burkholderia ambifaria</i> MC40-6                                                  |                                                         | ABCDE                      |
| * <i>Burkholderia cenocepacia</i> (strain HI2424)                                       | Human cystic fibrosis pathogen                          | ABCDE                      |
| <i>Burkholderia cepacia</i> (strain J2315/LMG 16656)                                    | Animal pathogen in Mammalia and Insecta, Plant pathogen | ABCDE                      |
| <i>Burkholderia dolosa</i> AUO158                                                       |                                                         | CDE <sup>b</sup>           |
| * <i>Burkholderia glumae</i> (strain BGR1)                                              | Plant pathogen                                          | ABCDE                      |
| * <i>Burkholderia graminis</i> C4D1M                                                    |                                                         | BCDE                       |
| * <i>Burkholderia multivorans</i> (strain ATCC 17616/ 249)                              | Animal pathogen in Mammalia                             | ABCDE                      |
| * <i>Burkholderia phymatum</i> (strain DSM 17167/STM815)                                | Plant symbiont                                          | ABCDE                      |
| * <i>Burkholderia</i> sp. CCGE1001                                                      |                                                         | ABCDE                      |
| * <i>Burkholderia vietnamiensis</i> (strain G4/LMG 22486)                               |                                                         | ABCDE                      |
| * <i>Burkholderia xenovorans</i> (strain LB400)                                         |                                                         | ABCDE                      |
| * <i>Chromohalobacter salexigens</i> (strain DSM 3043/ATCC BAA-138/NCIMB 13768)         |                                                         | ABCDE                      |
| <i>Chthoniobacter flavus</i> Ellin428                                                   |                                                         | BCDEF                      |
| <i>Citricella</i> sp. SE45                                                              |                                                         | BCDEF                      |
| * <i>Cowellia psychrerythraea</i> (strain 34H/ATCC BAA-681)                             | Plant pathogen                                          | ABCDE                      |
| * <i>Cronobacter turicensis</i> (strain DSM 18703/LMG 23827/z3032)                      | Neonatal pathogen                                       | ABCDEF                     |
| * <i>Cupriavidus taiwanensis</i> (strain R1/LMG 19424)                                  | Plant pathogen                                          | ABCDE                      |
| * <i>Dechloromonas aromatica</i> (strain RCB)                                           |                                                         | ABCDEF                     |
| * <i>Dinoroseobacter shibae</i> (strain DFL 12)                                         | Animal symbiont                                         | ABCDEF                     |
| * <i>Enterobacter intermedius</i>                                                       | Rare opportunistic pathogen                             | ABCDEF                     |
| * <i>Enterobacter sakazakii</i> (strain ATCC BAA-894)                                   | Neonatal pathogen                                       | ABCDEF                     |

|                                                                                       |                                                                                     |        |
|---------------------------------------------------------------------------------------|-------------------------------------------------------------------------------------|--------|
| * <i>Erwinia amylovora</i> (strain ATCC 49946/CCPPB 0273/Ea273/27-3)                  | Plant pathogen                                                                      | ABCDEF |
| * <i>Erwinia pyrifoliae</i>                                                           | Plant pathogen                                                                      | ABCDEF |
| * <i>Erwinia tasmaniensis</i> (strain DSM 17950/Et1/99)                               | Plant commensal                                                                     | ABCDEF |
| <i>Fulvimarina pelagi</i> HTCC2506                                                    |                                                                                     | ABCDE  |
| <sup>†</sup> <i>gamma proteobacterium</i> HTCC2207                                    |                                                                                     | BCDE   |
| * <i>Geodermatophilus obscurus</i> (strain ATCC 25078/DSM 43160/JCM 3152/G-20)        |                                                                                     | ABCDE  |
| * <i>Gluconacetobacter diazotrophicus</i> (strain ATCC 49037/DSM 5601/PA15)           | Plant symbiont                                                                      | ABCDE  |
| <i>Gluconacetobacter hansenii</i> ATCC 23769                                          |                                                                                     | BCDE   |
| * <i>Gluconobacter oxydans</i>                                                        |                                                                                     | ABCDEF |
| <i>Gluconobacter sp.</i> H24                                                          |                                                                                     | ABCDEF |
| * <i>Granulibacter bethesdensis</i> (strain ATCC BAA-1260/CGDNIH1)                    | First reported case of invasive human disease caused by any of the Acetobacteraceae | ABCDEF |
| <i>Grimontia hollisae</i> CIP 101886                                                  | Potential agent of gastroenteritis and bacteraemia in the Mediterranean area        | BCDE   |
| * <i>Hydrogenobacter thermophilus</i> (strain DSM 6534/ IAM 12695/TK-6)               |                                                                                     | BCDEF  |
| * <i>Hyphomicrobium denitrificans</i> (strain ATCC 51888/DSM 1869/NCIB 11706/TK 0415) |                                                                                     | ABCDEF |
| * <i>Klebsiella pneumoniae</i>                                                        | Rare opportunistic pathogen                                                         | ABCDEF |
| <i>Klebsiella sp.</i> 1_1_55                                                          | Opportunistic pathogen                                                              | BCDEF  |
| * <i>Klebsiella variicola</i> (strain At-22)                                          |                                                                                     | ABCDEF |
| * <i>Leptothrix cholodnii</i> (strain ATCC 51168/LMG 8142/SP-6)                       |                                                                                     | ABCDE  |
| * <i>Limnobacter sp.</i> MED105                                                       |                                                                                     | ABCDEF |
| <i>Lutiella nitroferrum</i> 2002                                                      |                                                                                     | BCDEF  |
| <i>marine gamma proteobacterium</i> HTCC2143                                          |                                                                                     | BCDE   |
| <i>Marinobacter algicola</i> DG893                                                    | Plant symbiont                                                                      | ABCDEF |
| <i>Marinobacter sp.</i> ELB17                                                         |                                                                                     | BCDE   |
| * <i>Methylacidiphilum infernorum</i> (isolate V4)                                    |                                                                                     | ABCDEF |
| * <i>Methylibium petroleiphilum</i> (strain PM1)                                      |                                                                                     | ABCDEF |
| * <i>Methylobacillus flagellatus</i> (strain KT/ATCC 51484/DSM 6875)                  |                                                                                     | ABCDEF |
| * <i>Methylobacterium chloromethanicum</i> (strain CM4/NCIMB 13688)                   |                                                                                     | ABCDEF |
| * <i>Methylobacterium extorquens</i> (strain ATCC 14718/DSM 1338/AM1)                 |                                                                                     | ABCDEF |
| * <i>Methylobacterium nodulans</i> (strain ORS2060/ LMG 21967)                        | Plant saprophyte and symbiont                                                       | ABCDEF |
| * <i>Methylobacterium populi</i> (strain ATCC BAA-705/ NCIMB 13946/BJ001)             | Plant endophyte                                                                     | ABCDEF |
| * <i>Methylobacterium radiotolerans</i> (strain ATCC 27329/DSM 1819/JCM 2831)         | Plant symbiont                                                                      | ABCDEF |
| * <i>Methylobacterium sp.</i> (strain 4-46)                                           |                                                                                     | ABCDEF |
| * <i>Methylocella silvestris</i> (strain BL2/DSM 15510/ NCIMB 13906)                  |                                                                                     | ABCDEF |
| * <i>Methylococcus capsulatus</i>                                                     |                                                                                     | ABCDEF |
| <sup>†</sup> <i>Methylophaga thiooxidans</i> DMS010                                   |                                                                                     | BCDE   |

|                                                                                                              |                                   |        |
|--------------------------------------------------------------------------------------------------------------|-----------------------------------|--------|
| <sup>†</sup> <i>Methylosinus trichosporium</i> OB3b                                                          |                                   | BCDEF  |
| * <i>Methylotenera mobilis</i> (strain JLW8/ATCC BAA-1282/DSM 17540)                                         |                                   | ABCDEF |
| * <i>Methylotenera</i> sp. (strain 301)                                                                      |                                   | ABCDEF |
| * <i>Methylovorius</i> sp. (strain SIP3-4)                                                                   |                                   | ABCDEF |
| * <i>Mycobacterium smegmatis</i> (strain ATCC 700084/ mc(2, #5076)155)                                       | Animal commensal in Mammalia      | ABCDE  |
| <i>Neptuniibacter caesariensis</i>                                                                           |                                   | BCDE   |
| * <i>Nitrobacter winogradskyi</i> (strain Nb-255/ATCC 25391)                                                 |                                   | ABCDEF |
| <i>Nitrococcus mobilis</i> Nb-231                                                                            |                                   | ABCDEF |
| * <i>Nitrosococcus halophilus</i> (strain Nc4)                                                               |                                   | ABCDEF |
| * <i>Nitrosococcus oceani</i> ATCC19707                                                                      |                                   | ABCDEF |
| * <i>Pantoea ananatis</i>                                                                                    | Plant pathogen                    | ABCDEF |
| * <i>Pantoea</i> sp. At-9b                                                                                   |                                   | ABCDEF |
| * <i>Paracoccus denitrificans</i> (strain Pd 1222)                                                           |                                   | ABCDEF |
| * <i>Polaromonas naphthalenivorans</i> (strain CJ2)                                                          |                                   | ABCDEF |
| * <i>Pseudomonas aeruginosa</i>                                                                              | Opportunistic human pathogen      | ABCDEF |
| * <i>Pseudomonas entomophila</i> (strain L48)                                                                | Insect pathogen                   | ABCDEF |
| * <i>Pseudomonas fluorescens</i>                                                                             | Potential pathogen to birds       | ABCDEF |
| * <i>Pseudomonas mendocina</i> (strain ymp)                                                                  | Rare human pathogen               | ABCDEF |
| * <i>Pseudomonas putida</i> (strain KT2400)                                                                  |                                   | ABCDEF |
| <sup>†</sup> <i>Pseudomonas savastanoi</i> pv. <i>savastanoi</i> NCPPB 3335                                  | Tumor-inducing pathogen           | ABCDEF |
| * <i>Pseudomonas syringae</i> pv. <i>phaseolicola</i> (strain 1448A/Race 6)                                  | Plant symbiont                    | ABCDEF |
| <i>Rahnella aquatilis</i>                                                                                    | Rarely opportunistic pathogen     | ABCDEF |
| <sup>†</sup> <i>Ralstonia eutropha</i> (strain ATCC 17699/H16/ DSM 428/Stancier 337)                         |                                   | ABCDE  |
| * <i>Ralstonia pickettii</i> (strain 12D)                                                                    | Opportunistic nosocomial pathogen | ABCDEF |
| <sup>†</sup> <i>Rhizobium meliloti</i>                                                                       | Plant symbiont                    | ABCDE  |
| * <i>Rhizobium</i> sp. (strain NGR234)                                                                       | Plant symbiont                    | ABCDEF |
| * <i>Rhodobacter sphaeroides</i> (strain ATCC 17023/ 2.4.1/NCIB 8253/DSM 158)                                |                                   | ABCDEF |
| * <i>Rhodobacterales bacterium</i> HTCC 2654                                                                 |                                   | ABCDEF |
| * <i>Rhodomicrobium vannielii</i> ATCC 17100                                                                 |                                   | ABCDE  |
| * <i>Rhodopseudomonas palustris</i>                                                                          |                                   | ABCDEF |
| <i>Rickettsiella grylli</i>                                                                                  | Athropod pathogen                 | BCDEF  |
| * <i>Roseobacter denitrificans</i> (strain ATCC 33942/ OCh 114) ( <i>Erythrobacter</i> sp. (strain OCh 114)) |                                   | ABCDEF |
| * <i>Roseobacter litoralis</i> OCh 149                                                                       |                                   | ABCDEF |
| * <i>Roseobacter</i> sp. AzwK-3b                                                                             |                                   | ABCDEF |
| * <i>Roseovarius</i> sp. HCC2601                                                                             |                                   | ABCDEF |
| * <i>Saccharopolyspora erythraea</i> (strain NRRL 23338)                                                     |                                   | ABCDEF |
| * <i>Sagittula stellata</i> E-37                                                                             |                                   | ABCDEF |
| <i>Serratia marcescens</i>                                                                                   | Opportunistic human pathogen      | ABCDE  |
| <i>Serratia odorifera</i> 4Rx13                                                                              | Rare opportunistic pathogen       | ABCDEF |
| * <i>Shewanella woodyi</i> (strain ATCC 51908 / MS32)                                                        |                                   | ABCDEF |

|                                                                                              |                                |        |
|----------------------------------------------------------------------------------------------|--------------------------------|--------|
| * <i>Silicibacter pomeroyi</i>                                                               |                                | ABCDEF |
| * <i>Sinorhizobium medicae</i> (strain WSM419)                                               |                                | ABCDE  |
| * <i>Stackebrandtia nassauensis</i> (strain DSM 44728/NRRL B-16338/NBRC 102104/LLR-40K-21)   |                                | ABCDE  |
| * <i>Starkeya novella</i> (strain ATCC 8093/DSM 506/CCM 1077/IAM 12100/NBRC 12443/NCIB 9113) |                                | ABCDEF |
| * <i>Streptomyces bingchenggensis</i> (strain BCW-1)                                         |                                | ABCDEF |
| + <i>Streptomyces rochei</i>                                                                 |                                | ABCDE  |
| <i>Thiomonas sp.</i> (strain 3As)                                                            |                                | ABCDE  |
| * <i>Variovorax paradoxus</i> (strain S110)                                                  |                                | ABCDEF |
|                                                                                              | Animal endosymbiont in         |        |
| * <i>Verminephrobacter eiseniae</i> (strain EF01-2)                                          | <i>Eisenia foetida</i>         | ABCDEF |
| <i>Vibrio sp.</i> RC586                                                                      |                                | BCDE   |
| * <i>Xanthobacter autotrophicus</i> (strain ATCC BAA-1158/Py2)                               |                                | ABCDEF |
| * <i>Xanthomonas axonopodis</i> pv. <i>citri</i> (Citrus canker)                             | Plant pathogen                 | ABCDE  |
| * <i>Xanthomonas campestris</i> pv. <i>Campestris</i>                                        | Plant pathogen                 | ABCDE  |
|                                                                                              | Rice bacterial blight pathogen |        |
| * <i>Xanthomonas oryzae</i> pv. <i>Oryzae</i>                                                |                                | ABCDE  |

<sup>a</sup> Species with complete genome sequence available are labeled with \*. Species without a completely sequenced genome but with the PQQ operon gene order information are labeled with +.

<sup>b</sup> This is the sole entry lacking B.

**Table S3.** Location of PqqA homologues mis-annotated as intergenic regions in the NCBI database.

| Genome                                                                                     | Start position in genome | End position in genome | Distance to PqqB |
|--------------------------------------------------------------------------------------------|--------------------------|------------------------|------------------|
| <i>Acidiphilium cryptum</i> (strain JF-5)                                                  | 2308383                  | 2308324                | 2221863bp        |
| <i>Acidobacterium</i> sp. MP5ACTX8                                                         | 3186608                  | 3186667                | 22 bp            |
| <i>Agrobacterium radiobacter</i> (strain K84 )                                             | 1497718                  | 1497771                | 62 bp            |
| <i>Arcobacter nitrofigilis</i> (strain ATCC 33309 / DSM 7299 / LMG 7604 / NCTC 12251 / CI) | 2810583                  | 2810524                | 124 bp           |
| <i>Azoarcus</i> sp. (strain BH72)                                                          | 1279504                  | 1279563                | 151 bp           |
| <i>Azospirillum</i> sp. (strain B510)                                                      | 1287841                  | 1287900                | 148 bp           |
| <i>Azotobacter vinelandii</i> (strain DJ / ATCC BAA-1303)                                  | 4201776                  | 4201708                | 49 bp            |
| <i>Beijerinckia indica</i> subsp. <i>indica</i> (strain ATCC 9039 / DSM 1715 / NCIB 8712)  | 3779214                  | 3779140                | 35 bp            |
| <i>Burkholderia ambifaria</i> (MC40-6)                                                     | 438611                   | 438682                 | 68 bp            |
| <i>Burkholderia cenocepacia</i> (strain HI2424)                                            | 2155918                  | 2155847                | 65 bp            |
| <i>Burkholderia multivorans</i> (strain ATCC 17616/249)                                    | 227954                   | 228025                 | 67 bp            |
| <i>Burkholderia phymatum</i> (strain STM815)                                               | 1842594                  | 1842665                | 750928 bp        |
| <i>Burkholderia vietnamiensis</i> (strain G4 / LMG 22486)                                  | 1170047                  | 1169976                | 68 bp            |
| <i>Burkholderia xenovorans</i> (strain LB400)                                              | 3030290                  | 3030361                | 2369427 bp       |
| <i>Chromohalobacter salexigens</i> (strain DSM 3043 / ATCC BAA-138 / NCIMB 13768)          | 945885                   | 945956                 | 14 bp            |
| <i>Cronobacter turicensis</i> (strain DSM 18703 / LMG 23827 / z3032)                       | 944075                   | 944010                 | 69bp             |
| <i>Dechloromonas aromatica</i> (strain RCB)                                                | 1826581                  | 1826640                | 79bp             |
| <i>Enterobacter sakazakii</i> (strain ATCC BAA-894)                                        | 2948005                  | 2948070                | 61 bp            |
| <i>Granulibacter bethesdensis</i> (strain CGDNIH1)                                         | 2162621                  | 2162550                | 129 bp           |
| <i>Methylibium petroleiphilum</i> (strain PM1)                                             | 3236227                  | 3236295                | 476661bp         |
| <i>Methylobacterium chloromethanicum</i> (strain CM4 / NCIMB 13688)                        | 2254953                  | 2254867                | 51bp             |
| <i>Methylobacterium populi</i> (strain ATCC BAA-705 / NCIMB 13946 / BJ001)                 | 1905787                  | 1905701                | 52bp             |
| <i>Methylocella silvestris</i> (strain BL2 / DSM 15510 / NCIMB 13906)                      | 1231994                  | 1232068                | 49bp             |
| <i>Nitrobacter winogradskyi</i> (strain Nb-255 / ATCC 25391)                               | 771485                   | 771414                 | 69bp             |
| <i>Nitrosococcus oceani</i> ATCC19707                                                      | 2976128                  | 2976193                | 77 bp            |
| <i>Paracoccus denitrificans</i> (strain Pd 1222)                                           | 2358331                  | 2358260                | 88 bp            |
| <i>Polaromonas naphthalenivorans</i> (strain CJ2)                                          | 772866                   | 772801                 | 86 bp            |
| <i>Ralstonia eutropha</i> (strain H16 )                                                    | 1188199                  | 1188134                | 143 bp           |
| <i>Rhodopseudomonas palustris</i> (strain CGA009)                                          | 98346                    | 98414                  | 131 bp           |
| <i>Shewanella woodyi</i> (strain ATCC 51908 / MS32)                                        | 2764866                  | 2764798                | 79 bp            |
| <i>Sinorhizobium medicae</i> (strain WSM419)                                               | 370213                   | 370136                 | 60 bp            |
| <i>Starkeya novella</i> (strain DSM 506)                                                   | 1091028                  | 1091102                | 42 bp            |
| <i>Verminephrobacter eiseniae</i> (strain EF01-2)                                          | 4421713                  | 4421778                | 177 bp           |
| <i>Xanthobacter autotrophicus</i> (strain ATCC BAA-1158 /                                  | 2031196                  | 2031125                | 59 bp            |

Py2)

|                                                                     |         |         |        |
|---------------------------------------------------------------------|---------|---------|--------|
| <i>Xanthomonas axonopodis</i> pv. <i>citri</i> (Citrus canker)      | 3661812 | 3661871 | 96 bp  |
| <i>Xanthomonas campestris</i> pv. <i>Campestris</i> str. ATCC 33913 | 3492588 | 3492647 | 79 bp  |
| <i>Xanthomonas oryzae</i> pv. <i>Oryzae</i>                         | 3323436 | 3323495 | 111 bp |

**Table S4.** Result of Discern for PqqB from *K. pneumoniae* and PhnP from *E. coli* sequences. Homologous residues in PqqB and PhnP are based on the multiple sequence alignment and are plotted in the structure shown in **Figure 4**.

| PqqB KP |          |                   |                        | PhnP EC |          |                   |            |
|---------|----------|-------------------|------------------------|---------|----------|-------------------|------------|
| Residue | Position | Rank from Discern | Comments               | Residue | Position | Rank from Discern | Comments   |
| His     | 93       | 1                 | putative metal binding | His     | 81       | 4                 | ligand MnB |
| Asp     | 88       | 2                 |                        | His     | 76       | 6                 | ligand MnA |
| His     | 269      | 3                 | putative metal binding | His     | 222      | 7                 | ligand MnB |
| Arg     | 37       | 4                 |                        | Arg     | 37       | 15                |            |
| Asp     | 297      | 5                 | putative metal binding | Asp     | 245      | 13                |            |
| Asp     | 92       | 6                 |                        | Asp     | 80       | 8                 | ligand MnB |
| Asp     | 59       | 7                 |                        | Asp     | 59       | 60                |            |
| Ser     | 41       | 8                 |                        | Ser     | 41       | 21                |            |
| Asp     | 220      | 9                 |                        | Asp     | 187      | 10                |            |
| Gln     | 39       | 10                |                        | Pro     | 39       | 70                |            |
| His     | 244      | 11                |                        |         |          |                   |            |
| Gln     | 90       | 18                |                        | His     | 78       | 2                 | ligand MnA |
| Asn     | 55       | 19                |                        | Asp     | 54       | 3                 |            |
| Ser     | 163      | 37                |                        | His     | 143      | 5                 | ligand MnA |
| Gly     | 199      | 48                |                        | Asp     | 164      | 1                 | ligand MnA |



**Table S5.** Result of Discern for PqqC from *K. pneumoniae* and TenA from *B. subtilis* sequences. Homologous residues in PqqC and TenA are based on the multiple sequence alignment and are plotted in the structure shown in **Figure 5**.

| PqqC KP |          |                   |                     | TenA BS |          |                   |
|---------|----------|-------------------|---------------------|---------|----------|-------------------|
| Residue | Position | Rank from Discern | Comments            | Residue | Position | Rank from Discern |
| His     | 27       | 1                 |                     | His     | 21       | 11                |
| His     | 24       | 2                 |                     | Ser     | 18       | 27                |
| Lys     | 214      | 3                 |                     | Ser     | 201      | 14                |
| His     | 84       | 4                 | proton donor        | Thr     | 78       | 44                |
| Glu     | 147      | 5                 |                     | Tyr     | 136      | 21                |
| Arg     | 50       | 6                 |                     | Asp     | 44       | 1                 |
| Arg     | 179      | 7                 | O <sub>2</sub> core | Gly     | 164      | 180               |
| Tyr     | 29       | 8                 |                     | Phe     | 23       | 18                |
| Arg     | 80       | 9                 |                     | His     | 74       | 34                |
| His     | 154      | 10                | O <sub>2</sub> core | Gly     | 143      | 77                |
| Tyr     | 53       | 11                |                     | Tyr     | 47       | 5                 |
| His     | 30       | 12                |                     | Val     | 24       | 68                |
| Tyr     | 128      | 13                |                     | His     | 115      | 12                |
| Gln     | 54       | 14                |                     | Leu     | 48       | 28                |
| Arg     | 157      | 15                |                     | Leu     | 146      | 98                |
| Asp     | 223      | 16                |                     | Gly     | 212      | 109               |
| Tyr     | 23       | 17                |                     | Trp     | 14       | 160               |
| Trp     | 46       | 20                |                     | Tyr     | 40       | 7                 |
| Tyr     | 175      | 26                | O <sub>2</sub> core | Trp     | 167      | 169               |
| Pro     | 151      | 53                |                     | Cys     | 135      | 3                 |
| Gln     | 155      | 117               |                     | Tyr     | 139      | 4                 |
| Ser     | 220      | 126               |                     | Glu     | 205      | 2                 |
| Val     | 125      | 46                |                     | Tyr     | 112      | 6                 |
| Met     | 221      | 47                |                     | Phe     | 208      | 9                 |
| Ser     | 178      | 168               |                     | Tyr     | 163      | 8                 |

**Table S6.** Result of Discern for PqqD from *K. pneumoniae*.

| Residue | Position | Rank from Discern |
|---------|----------|-------------------|
| Glu     | 30       | 1                 |
| Ala     | 80       | 2                 |
| Lys     | 34       | 3                 |
| Arg     | 11       | 4                 |
| Arg     | 14       | 5                 |
| Tyr     | 13       | 6                 |
| Gly     | 31       | 7                 |
| Tyr     | 28       | 8                 |
| Trp     | 85       | 9                 |
| Asn     | 36       | 10                |

**Table S7.** Result of Discern for PqqE from *K. pneumoniae* and NirJ from *Sulfurovum* *sp.* sequences. Homologous residues in PqqE and NirJ are based on the multiple sequence alignment and are plotted in the structure shown in **Figure 7**.

| PqqE    |          |                    |                                | NirJ    |          |                    |                 |
|---------|----------|--------------------|--------------------------------|---------|----------|--------------------|-----------------|
| Residue | Position | Rank from INTREPID | Comments                       | Residue | Position | Rank from INTREPID | Comments        |
| Cys     | 26       | 1                  | N-terminal Fe-S cluster ligand | Cys     | 37       | 2                  | N-terminal Fe-S |
| Cys     | 22       | 2                  | N-terminal Fe-S cluster ligand | Cys     | 33       | 4                  | N-terminal Fe-S |
| Cys     | 29       | 3                  | N-terminal Fe-S cluster ligand | Cys     | 40       | 5                  | N-terminal Fe-S |
| Gly     | 67       | 7                  | SAM stabilizing residues       | Gly     | 77       | 11                 | SAM stabilizing |
| Gly     | 260      | 9                  |                                | Gly     | 28       | 14                 |                 |
| Gly     | 66       | 10                 | SAM stabilizing residues       | Gly     | 76       | 13                 | SAM stabilizing |
| Glu     | 68       | 11                 | SAM stabilizing residues       | Glu     | 78       | 18                 | SAM stabilizing |
| Tyr     | 28       | 12                 |                                | His     | 39       | 9                  |                 |
| Cys     | 309      | 20                 | C-terminal Fe-S cluster ligand | Cys     | 33       | 3                  | C-terminal Fe-S |
| Cys     | 306      | 21                 | C-terminal Fe-S cluster ligand | Cys     | 33       | 1                  | C-terminal Fe-S |
| Cys     | 337      | 24                 | C-terminal Fe-S cluster ligand | Cys     | 36       | 6                  | C-terminal Fe-S |
| Cys     | 319      | 25                 |                                |         |          |                    |                 |

**Figure S1. Maximum-likelihood trees of PqqB and its homologues.** Homologues of each Pqq protein seed sequence were retrieved using FlowerPower (1) (See **Methods**). The datasets were filtered to reduce redundancy, so that only ~100 sequences are shown in this figure. Numbers at each node are bootstrap values (only those >50 are shown). PqqB seed sequences were labeled in blue. From the PhnP subfamily, we selected six sequences annotated as PhnP and with the highest identity to *Klebsiella* PqqB. These selected PhnP are labeled in purple. The upper box indicates the orthologues of PhnP (P11692) and the lower one indicates PqqB (B5XX61) orthologues. Trees were rooted using PqqB orthologues as the outgroup. See **Figure S6** for their alignments.

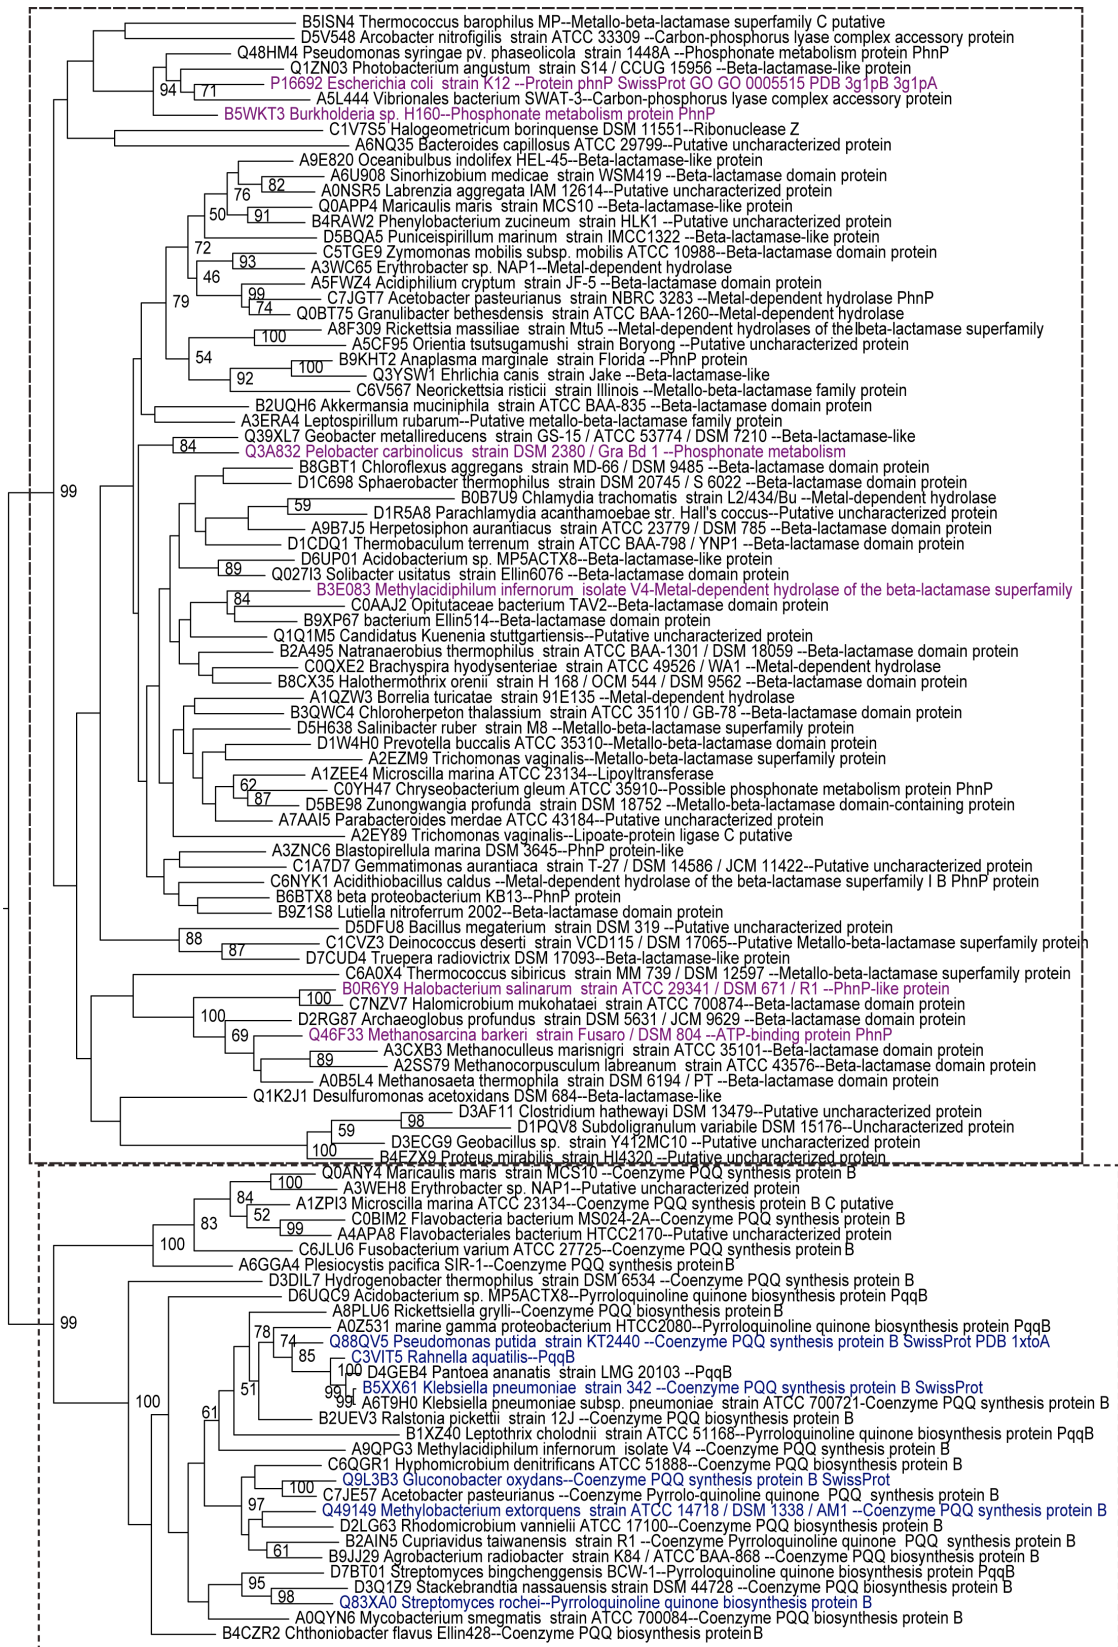

0.4

**Figure S2. Maximum-likelihood trees of PqqC and its homologues.** Homologues of each Pqq protein seed sequence were retrieved using FlowerPower (1) (See **Methods**). The datasets were filtered to reduce redundancy, so that only ~100 sequences are shown in this figure. Numbers at each node are bootstrap values (only those > 50 are shown). PqqC seed sequences were labeled in blue. From the TenA subfamily, we picked representative a TenA sequence with experimental evidence and solved 3-D structure, in this case the sequence P25052. And we chose another four sequences with highest identities to it and *Klebsiella* PqqC as representative TenA proteins, and labeled the sequences in purple. Numbers at each node are bootstrap values. The upper box indicates the orthologues of TenA (P25052) and the lower one indicates PqqC (B5XX60) orthologues. See **Figure S7** for their alignments.

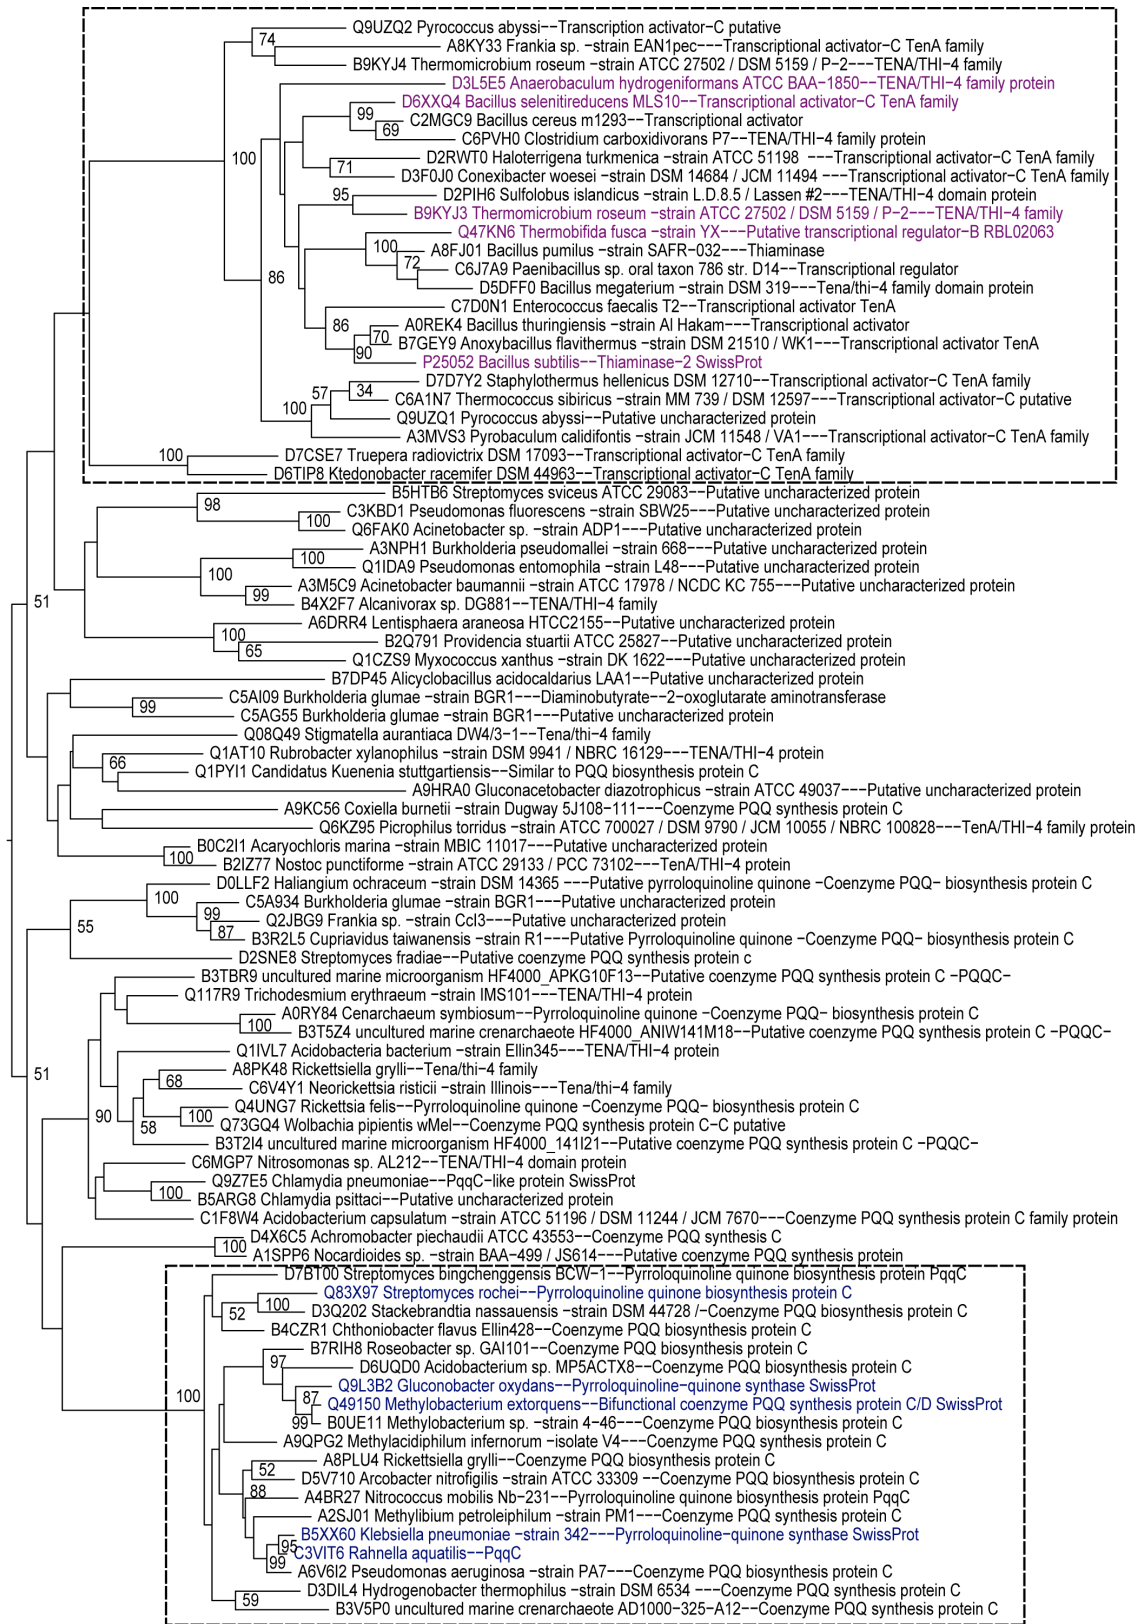

0.6

**Figure S3. Maximum-likelihood trees of PqqD and its homologues.** Homologues of each Pqq protein seed sequence were retrieved using FlowerPower (1) (See **Methods**). The datasets were filtered to reduce redundancy, so that only ~100 sequences are shown in this figure. Numbers at each node are bootstrap values (only those >50 are shown). Orthologues of PqqD are boxed in the figure. The five PqqD seed sequences were labeled in blue. See **Figure 7B** for their alignments. Bootstrap values are low for most nodes due to the short length of PqqD proteins (~90 amino acids).



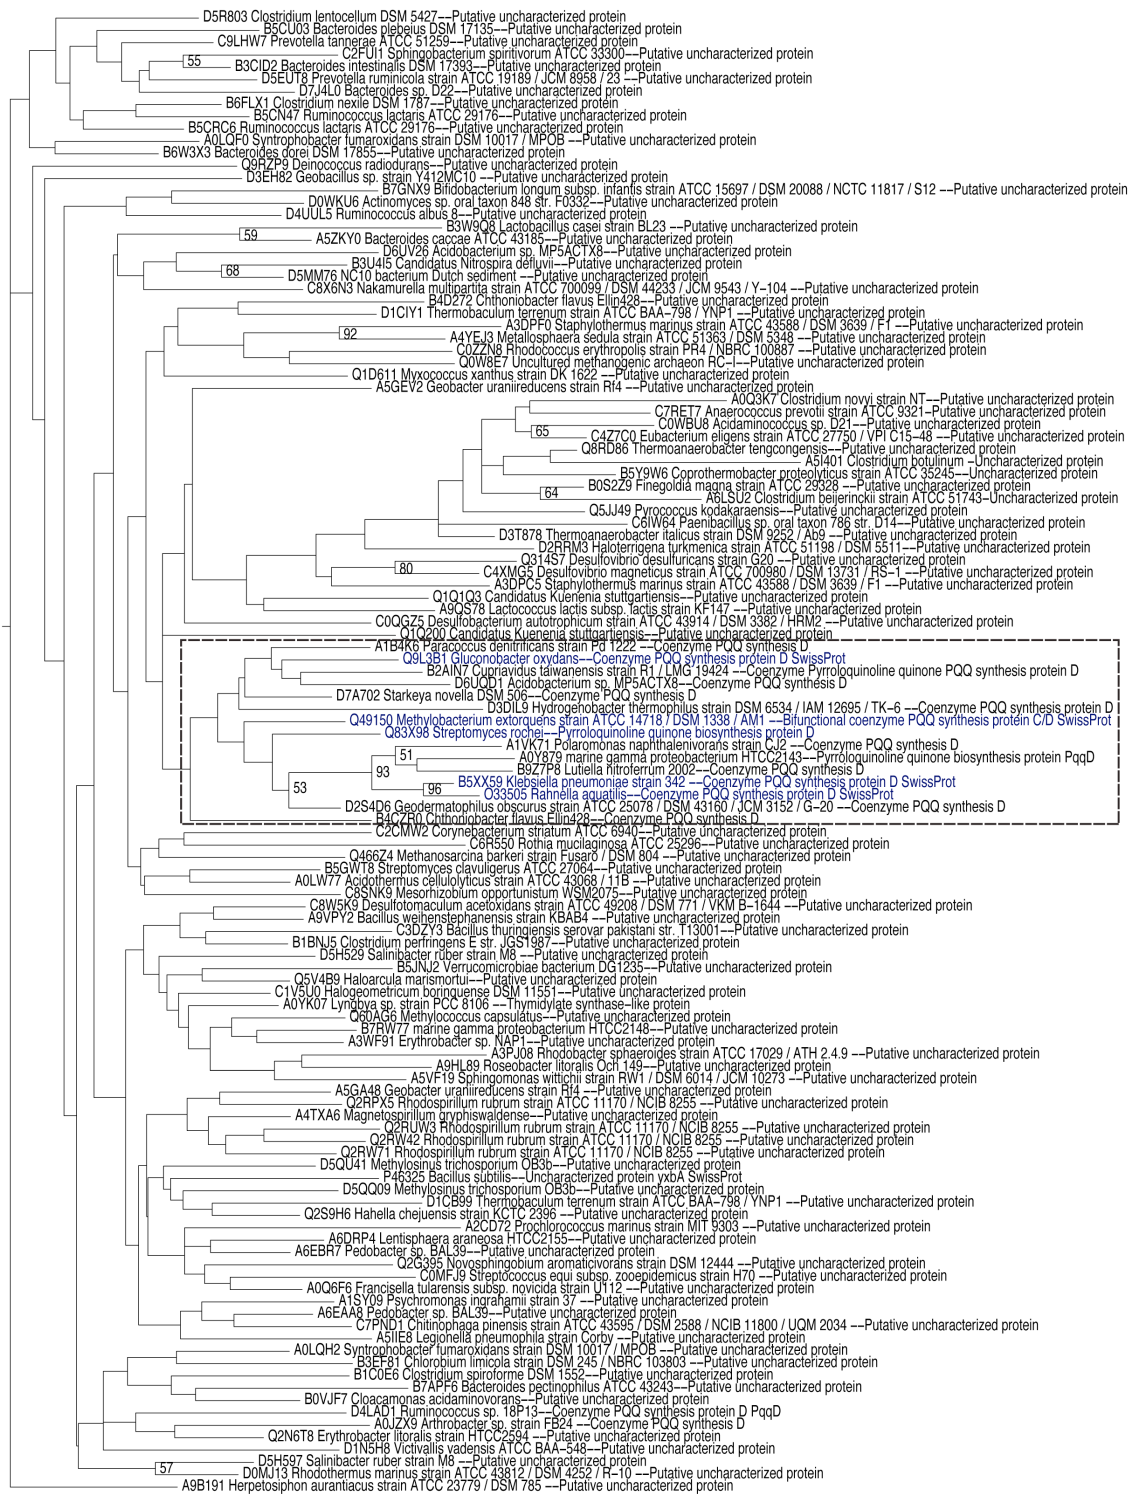

**Figure S4. Maximum-likelihood trees of PqqE and its homologues.** Homologues of each Pqq protein seed sequence were retrieved using FlowerPower (1) (See **Methods**). The datasets were filtered to reduce redundancy, so that only ~100 sequences are shown in this figure. Numbers at each node are bootstrap values (only those >50 are shown). PqqE seed sequences were labeled in blue. From the NirJ subfamily, we picked five NirJ sequences that have the highest identity of PqqE as representatives and labeled them in purple. The upper box indicates the orthologues of NirJ (A6Q6Z2) and the lower one indicates PqqE (B5XX58) orthologues. See **Figure S8** for their alignments.

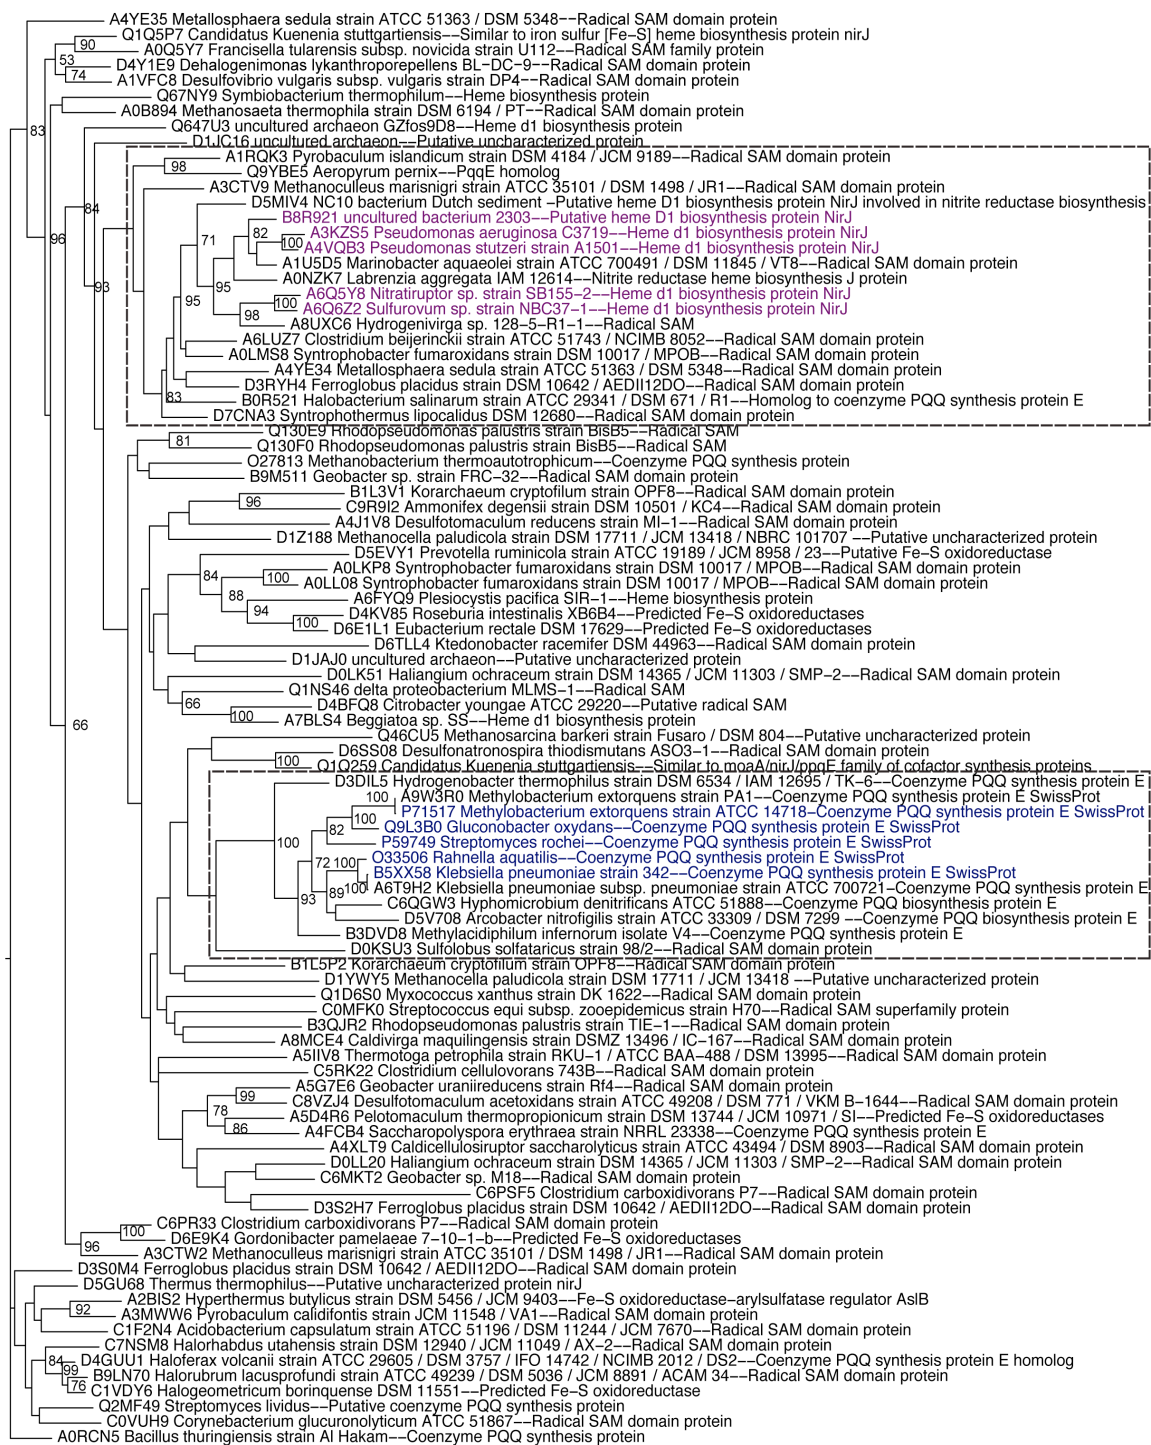

0.5

**Figure S5.** Identified Pfam domains in PqqE, NirJ, and MoaA: three radical SAM proteins with two 4Fe-4S clusters. The C-terminal region is not conserved. Numbers indicate the beginning and end of identifiable Pfam domains in the primary sequence of each enzyme.

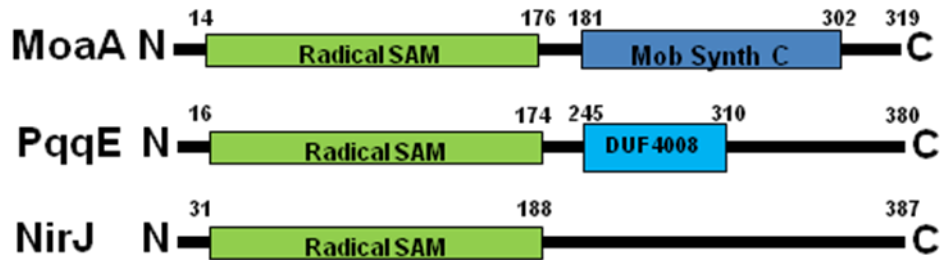

**Figure S6. MSA of selected PqqB orthologues and PhnP orthologues.** Six representative sequences of each orthologue groups were included in the MSA. Five-seed PqqB sequences and an additional PqqB with solved 3D structure were selected. From the PhnP subfamily, we picked a representative PhnP sequence with experimental evidence of its function and solved 3-D structure. We also selected other five sequences annotated as PhnP and with the highest identity to *Klebsiella* PqqB.

```

PqqB_Q88QV5_PP 1 M-----YIQVLGSAAGGGFPQWNCNCVNCVNGYRDGTLKATARTQSSIALSDQGVH-WI
PqqB_B5XX61_KP 1 M-----FIKVLGSAAGGGFPQWNCNCANCOGLRNGTIQASARTQSSIIIVSDNGKE-NV
PqqB_C3VIT5_RA 1 M-----QIIVLGSAGGGFPQWNCNCRCNCGVNRNGTMTSPRTQSSIAVSDNGTD-NV
PqqB_Q83XA0_SR 1 M-----ILLGTAGGGFPQWNCACALCARGRRGELP--ARSQECVAVSDGGRD-NWJ
PqqB_Q49149_ME 1 M-----HVIVLGSAGGGFPQWNCRCISCLAVJAGDSRVRPRTQSSIAVSPDGER-NLJ
PqqB_Q9L383_G0 1 M-----IDVIVLGAAGGGFPQWNSAAPGCVAARTRQ-GAKARTQASLAVSADGKR-WF
pnhP_P16692_EC 1 M-----SLTLLTGTGGAGQVPAWGCECAACARARRSPQY--RRQPCSGVVKFNDAI--T
pnhP_B5WKT3_B 1 M-----MRITFLGTGAAGVPLYGDCPCACTRARAVPAC--VRRPCSALETDTTR--V
pnhP_Q3A832_PC 1 M-----IRSQTMINIVLLGTGTSTGVPMLGNCNDCVCRSSDPRD---RRTRCSALISWGARN--I
pnhP_B3E083_MI 1 M-----MFYLLPALKATGFLFKYLLFFMDIPSKQSKIVVLLGSGTSQGVPMIGCPATCHSQDPRD---NRTRCSLYITDQQA--I
pnhP_Q46F33_MB 1 M-----RLTLLGTGDAVGTPIKIGCNPACEDARKGGKS--QRLRFSILVESDKGK--I
pnhP_B0R6Y9_HS 1 M-----KVTLLGTGOTTGTPTPGCCATCQAARERGV---ERTFRSVHVAQEAASGDAL

PqqB_Q88QV5_PP 53 LCNAS-PDIRAQLQAFAPMQPARLRD--TGINAIVLDSQIDHTTGLLSL-R----EGCPHQVWCT---DMVHQDIT
PqqB_B5XX61_KP 53 LCNAS-PDISQQAHTPELNKPGVLRG--TSIGGIITLDSQIDHTTGLLSL-R----EGCPHQVWCT---REVHEDLS
PqqB_C3VIT5_RA 53 LCNAS-PDICHQIAATPELIKHOVLRG--TAIGSIIITLDSQIDHTTGLLSL-R----EGCPHQVWCT---REVHEDLT
PqqB_Q83XA0_SR 49 LLNAS-PDIRTQLLAPALTPGPGPRD--TPVRGVLTLDAEVDHALGLAVL-R----GATGLTVYAA---PPVRGALS
PqqB_Q49149_ME 53 LLNAS-PDIRQQIANPQMHPREGLRH--SPIHVVLLTNGDVHVAAGLLT-R----EGQFFLYAT---PGLIASVS
PqqB_Q9L383_G0 53 ILNAS-PDLRQQIIDTPALHHQGSLRG--TPIQGVVLTCEIIDAITGLLTL-R----EREFFLMGS---DSTLQQLA
pnhP_P16692_EC 52 LIDAGLHDLADRWSP-----GSFQQFLTHYMDHVQGLFPL-R---WGVGQPIVYV---PPDEQGD
pnhP_B5WKT3_B 51 LLDAGLVDLSERFPA-----GSLDAIVLTHFHPDHVQGLFHL-R---WGVGKPIPTWA---PPDSNGNC
pnhP_Q3A832_PC 74 LIDTG-TDLHQQA-----LRESLTHVDGVLYTHAHADHVHGIDDL-RAFNMVSKESIPIFGS---PATSMSVR
pnhP_B3E083_MI 75 LIDTP-PELRQC-----LRENISMLTAVLFTSHADHIMGFDDL-RRFCDLSSGKLPYIGS---QEVMSVA
pnhP_Q46F33_MB 50 LIDTS-PDLRQQF-----LKNLSCVDGVILTHGHYDHYSGFGEFYR---VQNKVDVYVGV---QENIEYIN
pnhP_B0R6Y9_HS 51 LIDFS-PDFRAQFLRTDAL-----SLPDAGVIVTHVFDHLDGLGNAYR---LFDLPLVYATD0TPTGESVA

PqqB_Q88QV5_PP 120 TGFP-LFNMLSHWNGGLQVNR--IELE-----GSFVID----ACPNLKFTFPLRSAPPYSPHRF---DHPGDNLG
PqqB_B5XX61_KP 120 TGFP-VFTMLRHUNGLVHHP--IAPQ-----QPFTVD----ACPDQFTAVPIASNAPPYSPYRD---RPLPGHNVA
PqqB_C3VIT5_RA 120 TGFP-ITMLSHWNGGLQVNR--IGPE-----KRFVA----VCPNLKFTAIPLLSNAPPYSPYRG---KRLPGHNIA
PqqB_Q83XA0_SR 116 AELP-VRGLDRYAPWDWRDA--TAP-----GGFAVA----GGLTVTAHPVGTKAPKYAHAP---DPDAFWCA
PqqB_Q49149_ME 120 DNR--VDMMAAD-----VVKR-----QTALNETFEPVPGLSVTLFVSPGKVLWLEDASMEIGRETETTVG
PqqB_Q9L383_G0 120 DNP--IIGALDPE-----IVPR-VPLILDEATSLMNKDGIPSGLLLTAFAVPGKAPLYAEAR---GSRDEITLG
pnhP_P16692_EC 109 DLFK-----HPGLLDFSHTVEPF-----VVFDLQ-----GLQVTLPLNH-----SKLTFG
pnhP_B5WKT3_B 108 DLYR-----NPGLLAFNH-AEKF-----GTFDVG-----GLRFTALPLIH-----SKPTFG
pnhP_Q3A832_PC 117 RNFSYIFDTQGGVGV-----FRPLDPUDVRGPFSLF-----GLPVEPVAMQH-----GPGEASG
pnhP_B3E083_MI 138 RIFRYAEDPSSEKGYLRVLPHTIAPY-----ESFSIG-----SFTITAFPLPH-----QQTITFG
pnhP_Q46F33_MB 109 QYVVF-----LKPRYHYVKLYEFPDLI-----GLQFTLFKVNH-----PPVEVPTG
pnhP_B0R6Y9_HS 115 ETVAGKYDYLDLSIALRG-----VAPR-----RSFAAA-----GFDVTLVVDH-----PPLLCYG

PqqB_Q88QV5_PP 183 LVEDTRTGGKLFYAPGLG-QVDEKLLAMH--GADCLLVDTGWEDDEMQRGVTGRTGRE-MGHL-----
PqqB_B5XX61_KP 183 LFIEYRRNGQTLFYAPGLG-EPDEALLPWLQ--KADCLLIDGTVMQDDELQAAGVGRNTRGD-MGHL-----
PqqB_C3VIT5_RA 183 LFIEDTKTGSLLYAPGLG-EPDELKWLH--KADCLLIDGTLMQDDELATTGVRNTRGD-MGHL-----
PqqB_Q83XA0_SR 175 YRIEDPATGGALVYAPCLA-TWPDGFDLLA--SATCALLDGTFFSAGELGTATSSAGAGQSLMGHL-----
PqqB_Q49149_ME 181 TMIEA--GGKRLAYIPGCA-RVTEOLKARIA--GADALLFDGTVLEDDDMIRAGVGTKTQJR-MGHI-----
PqqB_Q9L383_G0 183 LSITD--GCKTMLFIPGCA-QITSEIVERA--AADLVFFDGTWRRDDEMIRAGLSPKSGQR-MGHV-----
pnhP_P16692_EC 150 YLEET--AHSRVAVLSDTA-GLPEKTLKFLRNQPVQVMVMDCSH-----PPRADAPR-----
pnhP_B5WKT3_B 148 YAIEG-PDGERFAYLTDTI-GLPSTLDLQWJGPFSLALDCSF-----PPRAQPA-----
pnhP_Q3A832_PC 166 YRIGP-----FAYLTDON-VIPASLEHLR--GLEVLVLDGLRF-----RSHF-----
pnhP_B3E083_MI 189 YLFEK-EGEKILAYLVDCR-SVPQKTIERLS--AVDYLFIDGLRD-----EPHF-----
pnhP_Q46F33_MB 150 VITRE--GDKKVVITGDTNSEIPASLELM--NPDLLIADAIV-----PPNTHIK-----
pnhP_B0R6Y9_HS 160 VVVER--AGAKLAVSGDTHYAIPEASRDAMR--DPDLLVADGIV-----PAHLTHHHKGGRRHPDA

PqqB_Q88QV5_PP 246 -----AQNPGGMLEVLDFGFRQRKVLITHINNTNPILDENSEPRAEVLRRGVEVAFDGMSTIEL-----
PqqB_B5XX61_KP 246 -----ALSDEHGMALLASLPAKRKILITHINNTNPILNELSPQRQALKQQGIEVSDGMMAITL-----
PqqB_C3VIT5_RA 246 -----ALAEQGLIALLSSLPAERKILITHINNTNPILNEASAEERQALTQONIEVSDGMRIEL-----
PqqB_Q83XA0_SR 239 -----PVAGPGGSLAALARHRLRRIYTHLNNTPILLDPSAHAHAAREAGVEVLPDGSSELVL-----
PqqB_Q49149_ME 242 -----QMNGETGSIASLADIEIGRRVFNHNNTPNVLIEDSYERASVEARQWTVAHDGLTLDL-----
PqqB_Q9L383_G0 244 -----SVNDAGGPFVECFCTCEKPRKVLITHINNSNPILFEDSPERKDVERAQWTVAEDGMTFR-----
pnhP_P16692_EC 199 -----NHCDLNTVLALNQVIRSPRVILTHISHQFDALMENA-----LPSGFVEVFGDGMIEGV-----
pnhP_B5WKT3_B 197 -----NHNDWDTACALVEQMRPERTLTHVSHGLDWTWLEQSESA--MPEGLIAHDGMAMHL-----P
pnhP_Q3A832_PC 206 -----THFSIDEAIKLAQLRGLARRTLTHICHEV-----SHARDSRDLPPGIELAYDGRQFSLFVKDAQSATRPL-----
pnhP_B3E083_MI 234 -----THLSTSEAVAIARQIGAKRTFLTHITHHK-----SHKREASLPKNVHVYDGLGIEIAF-----
pnhP_Q46F33_MB 197 -----KHMNSEAMALAEQLNAKIALIHLSHLF-----RPHHIESLFLPLGYDGVQVFEF-----
pnhP_B0R6Y9_HS 212 DGVPRFTGKMTREGALALGDLDADRTRVVAHAYYPVEEAFADL-----IADVGETIRE-----

PqqB_B5XX61_KP 304 -----QDTAC 308
PqqB_Q9L383_G0 302 -----DTP 304
pnhP_P16692_EC 252 -----A 252
pnhP_B5WKT3_B 254 ADSRTRPTSEGDRHG 268
pnhP_Q3A832_PC 272 SAPQSTHETNHRIGL 286

```

**Figure S7. MSA of selected PqqC orthologues and TenA orthologues.** Five representative sequences of each orthologue groups shown in **Figure S4** were included in the MSA.

```

PqqC_B5XX60_KP      1 ML-----ITDTLSPQAFEEALRAKGA-FYH--IHHPYHIAMHNGEATREIQGQVWVNRFYQTTIPLKDAAIMAN
PqqC_C3VIT6_RA     1 MT-----TSSNRTSPMTPEAFEEALRAKGA-FYH--IHHPYHIAMHNGQATREIQGQVWVNRFYQTTIPLKDAAIMAN
PqqCD_Q49150_ME    1 MTAQFPPVPDTEQRLLSHEELAALRDI GARRYH--NLHPFHRLLHDGKLSKQVQVAMALNRYYYQARI PVKDAALLAR
PqqC_Q9L3B2_GO     1 MT-----LLTPDQLEAQLRQIGARYH--NRHPFHRKLDHGKLDKAVQVAMALNRYYYQARI PAKDATLLAR
PqqC_Q83X97_SR     1 MS-----MSVTREVAAPWSEAEFRQLHALES SYND--RHPPFHRMHEGLLDEGELRLWAANRWYQRCLPQKDAIVAN
TenA_B9KYJ3_TR     1 MT-----SFTQELWRSIDPIYQAI VVHPFLVGLTDGTLPEEA FRFYVVDALYLQDYARCLALAAAK
TenA_D3L5E5_AH     1 MG-----KSLSEILWEEENRDI AASCLNHPFVQGIASGKLTREKFNWYVGDYFYLHAFKAFCLA AAK
TenA_D6XXQ4_BS     1 MT-----FSDRLRSKLG PVWRQNHEHPFVKLGSGELEETKFRFFMVQDYLYLIEYAKLFAIGTVK
TenA_P25052_BS     1 MK-----FSEECRSAAAEWMEG SFVHPFVQGI GDTLPIDRFKYVVLQDSYLYLTHFAKVQSF GAAY
TenA_Q47KN6_TF     1 MG-----VLPVTDGETGTAE LGRRHADLEAFYQHPFLKGLREGSL SREQVLHYVAQDYQLTAYTRCYGLGMAL

PqqC_B5XX60_KP     68 CPDAQTRRKWVQ-----RILDH DGHGEGGIEAWLRLGEAVGLSRDLLSERHVLPGVRF AVDAYLNFARRACWQE
PqqC_C3VIT6_RA     72 CPDAQTRRKWVQ-----RILDH DGHGEGGIEAWLRLGEAVGLDRDVLSEERVLPGVRF AVDAYVNFARRAWQE
PqqCD_Q49150_ME    79 LPDAQLRRIWRQ-----RIVDHDGHEGGIERWLKLAEGVGFTRDYV LSTKGLSATRF SVDAYVNFVRSERLLE
PqqC_Q9L3B2_GO     66 LPTAELRREWR-----RIEDHDGTEPGTGGVARWMLT DGLDRDYVESLDGLLPATRF SVDAYVNFVRDQSILA
PqqC_Q83X97_SR     74 CPLPEVRRQLS-----RIVYHDGADACAGGA EKWLRLAEAVGLRDEVDHERLVLAGTRFAVDAYVDFARRRPWLE
TenA_B9KYJ3_TR     63 APRETWCELFA DHAKVALVVERALHES-----FFAAWGLSPDKIAGTPYAPTNL-----AYTSYLLRVAYER
TenA_D3L5E5_AH     64 APDTLGMVSHKLAEGALN-EMK LHK-----FESSLGADVESVWASKPTR-----MYTDFLLSTAWGC
TenA_D6XXQ4_BS     62 ATDLKMTQTFATLLESTMNSEMALHRE-----YAKEFGISEELEQAEPSVTL-----AYTHYMLHVGNNG
TenA_P25052_BS     62 AKDLYTTGRMASHAQGT YEAEMLHRE-----FAELLEISEERKAFKPSPTAY-----SYTSHMYRSVLSG
TenA_Q47KN6_TF     72 SPDRRWMRFHDNAAVILCAETHAHES-----LCAYVGVSYEEAQADHLAPTAQ-----AYINHMEAGRD-

PqqC_B5XX60_KP     140 AACSSLTELFAPQIHQSRLD-SWPQH-----Y-P-WIKEEGYFYFRSRLSQANRDVEHGLALAKTYCDSA EKQNRML
PqqC_C3VIT6_RA     144 AACSSLTELFAPQIHQARLD-TWPQH-----YK-WIEEEGYFYFRSRLSQANRDVEHGLQLALEYCDTVEKQQRML
PqqCD_Q49150_ME    151 AIASSLTEMFSPTIISERVA-GMLKN-----YD-FITKOTLAYFKRLTQAPRDADFALDYVVKRHTTPEMQRAAI
PqqC_Q9L3B2_GO     138 AIASSLTEMFSPTIISERVS-GMLRH-----YD-FVSEKTLAYFTPRLTQAPRDSDFALAYVREKARTPEQQKEVL
PqqC_Q83X97_SR     146 AAASGLTELFSPGLLAHRLG-RLREH-----Y-P-WIAEEGFYFTARIEVVGPEGRSLDLVARHAYVSRQQEACV
TenA_B9KYJ3_TR     125 PFEEVIGALLPCYWIYWEVG-KHLER--SGSPNPLYQKWIDTYASEEYAAVWQAV-----LDVADQVVDLPESTRQP
TenA_D3L5E5_AH     122 DVGLIAAATTPCNRLYAWIG-QNLKEYAQNEENPFID-WIRTYSDDSFESLARET-----ERLIDL YATNVSEARKA-
TenA_D6XXQ4_BS     124 GLAELVAALLPCMWSYAEIG-KELEGVPGAVEGR-YGEWJRTYADEEFQSLNRQT-----IDLDELREGKPERELKR
TenA_P25052_BS     124 NFAEIL AALLPCYWLYYEVGKLLH---CDPGHPIYQKWJGT YGGDWFRQQVEEQ-----INRFDELAE NSTEEVRAK
TenA_Q47KN6_TF     133 TLGVLLSALLPCPWTYLWAAARFTSETPLDPSHPFYG-WWDFYAGLYESQKLTQT-----RAMLDELAAAAGPAERER

PqqC_B5XX60_KP     209 EILQFKLDILWSMLDAMTMAYAL--QRPPYHTVTDKAAWHHTRLV-----
PqqC_C3VIT6_RA     213 EILQFKLDILWSMLDAMSMAYEL--NRPPYHSVTQQAVWHKGRLL-----
PqqCD_Q49150_ME    220 DALTFKCNVLTQLDALYFAYVAPGMVPP-----DAWQPGEGLV AETNSAEDSFAAASPAATTAEPTAFSGSDVPRL
PqqC_Q9L3B2_GO     207 GALEFKCSVLWMTLDALDYAYVE-GHIPP-----GAFVP-----
PqqC_Q83X97_SR     215 RALAFKCRVNAVLDSDLYHTGN-----GATRS-----
TenA_B9KYJ3_TR     195 IRTHFVTTARYEWM-FWDAWRL-----ERWVPV-----
TenA_D3L5E5_AH     192 ---YRYAMICEY-DFFDAWKY-----EASKGGGERQL-----EEA
TenA_D6XXQ4_BS     195 LEEIFLNTTRFEY-LFWDMSYKE-----DMWPEG-----
TenA_P25052_BS     194 MKENFVISSY EY-QFWGMAYRK-----EGWSDSAI KEVEECGASRHNG-----
TenA_Q47KN6_TF     205 MERAFVASCHEYI-RFWEMAWSL-----EDWTPP-----NGS

PqqCD_Q49150_ME    293 PRGVRLRFDEVRNKHVLLAPERTFDLDDNAVAVLKLVDGRNTVSQIAQILGQTYDADPAIIEADILPMLAGLAQKRVLER 372

```

**Figure S8. MSA of selected PqqE orthologues and NirJ orthologues.** Five representative sequences of each orthologue groups shown in **Figure S8** were aligned in the MSA.

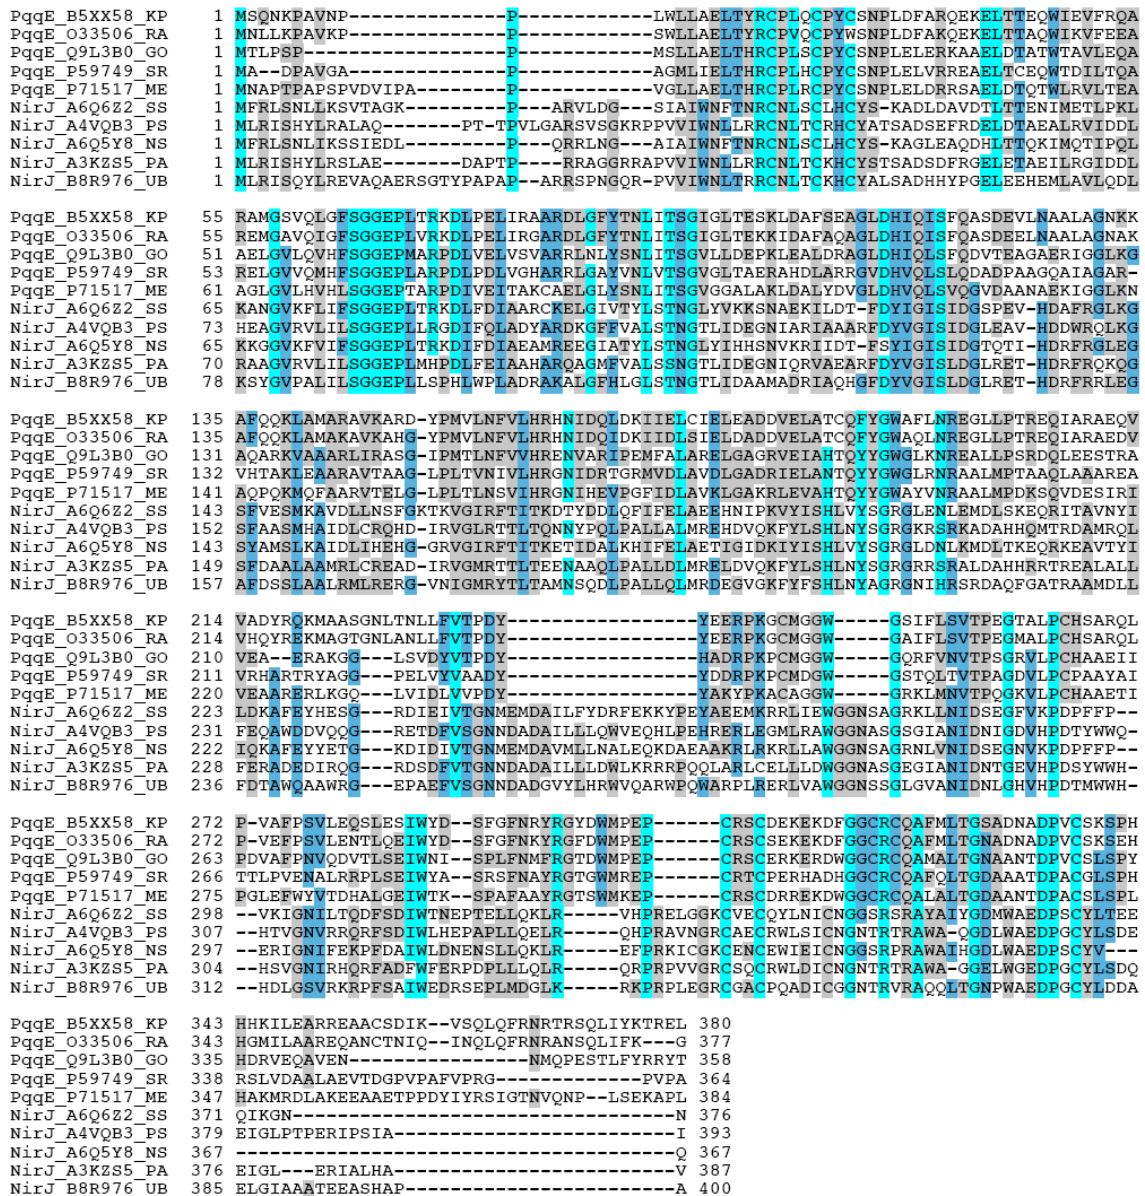



## References

1. Krishnamurthy, N., Brown, D., and Sjolander, K. (2007) FlowerPower : clustering proteins into domain architecture classes for phylogenomic inférence of protein function. *BMC Evol. Biol.* 7 Suppl 1, S12.
